# Supplementary material for: Diagnostic Performance of the Modified Korean Thyroid Imaging Reporting and Data System for Thyroid Malignancy: A Multicenter Validation Study
Source: PubMed Central journal article supplement — Korean J Radiol. 2021 Jun 1;22(9):1579–86. doi: 10.3348/kjr.2021.0230 (PMC8390813; doi:10.3348/kjr.2021.0230), 2021-06-01
Supplement: kjr-22-1579-s001.pdf [file kjr-22-1579-s001.pdf]

## SUPPLEMENT

**Supplementary Table 1. US Patterns of Subcategorized Intermediate Suspicion Nodules by Modified K-TIRADS 2**

| Category                 | US Pattern                                                                                                                                                                                 |
|--------------------------|--------------------------------------------------------------------------------------------------------------------------------------------------------------------------------------------|
| 4 Intermediate suspicion | 1) Solid hypoechoic nodule without any of 3 suspicious US features* or<br>2) Partially cystic or isoechoic and hyperechoic nodule with any of 3 suspicious US features*                    |
| 4B                       | 1) Solid hypoechoic nodule with marked hypoechoogenicity or macrocalcification <sup>†</sup><br>2) Partially cystic or isoechoic and hyperechoic nodule with 2 or 3 suspicious US features* |
| 4A                       | 1) Solid mildly hypoechoic nodule without macrocalcification <sup>†</sup><br>2) Partially cystic or isoechoic and hyperechoic nodule with 1 suspicious US feature*                         |

\*Microcalcification, nonparallel orientation (taller-than-wide), spiculated/microlobulated (irregular) margin, <sup>†</sup>Includes isolated macrocalcifications. K-TIRADS = Korean Thyroid Imaging Reporting and Data System, US = ultrasonography
