# Supplementary material for: Diagnostic Performance of the Modified Korean Thyroid Imaging Reporting and Data System for Thyroid Malignancy: A Multicenter Validation Study
Source: PubMed Central journal article supplement — Korean J Radiol. 2021 Jun 1;22(9):1579–86. doi: 10.3348/kjr.2021.0230 (PMC8390813; doi:10.3348/kjr.2021.0230), 2021-06-01
Supplement: kjr-22-1579-s002.pdf [file kjr-22-1579-s002.pdf]

**Supplementary Table 2. The Frequency and Malignancy Risk for Nodules according to the Categories of 2016 K-TIRADS and Modified K-TIRADS**

| US Risk Stratification System | Benign<br>(n = 4597) | Malignant<br>(n = 1111) | Total Nodules<br>(n = 5708, %) | Calculated Risk<br>of Malignancy (%) |
|-------------------------------|----------------------|-------------------------|--------------------------------|--------------------------------------|
| <b>2016 K-TIRADS</b>          |                      |                         |                                |                                      |
| High suspicion                | 245                  | 536                     | 781 (13.7)                     | 68.6                                 |
| Intermediate suspicion        | 1207                 | 364                     | 1571 (27.5)                    | 23.2                                 |
| Low suspicion                 | 2860                 | 203                     | 3063 (53.7)                    | 6.6                                  |
| Benign                        | 285                  | 8                       | 293 (5.1)                      | 2.7                                  |
| <b>Modified K-TIRADS</b>      |                      |                         |                                |                                      |
| High suspicion                | 244                  | 536                     | 780 (13.7)                     | 68.7                                 |
| Intermediate suspicion        | 1180                 | 362                     | 1542 (27.0)                    | 23.5                                 |
| Low suspicion                 | 2864                 | 204                     | 3068 (53.7)                    | 6.6                                  |
| Benign                        | 309                  | 9                       | 318 (5.6)                      | 2.8                                  |

K-TIRADS = Korean Thyroid Imaging Reporting and Data System, US = ultrasonography
